# Supplementary material for: The m6A reader YTHDC1 and the RNA helicase DDX5 control the production of rhabdomyosarcoma-enriched circRNAs
Source: PubMed Central journal article supplement (PMC10076346; doi:10.1038/s41467-023-37578-7), 2023-04-05
Supplement: 41467_2023_37578_MOESM1_ESM.pdf [file 41467_2023_37578_MOESM1_ESM.pdf]

## Supplementary Information

### The m<sup>6</sup>A reader YTHDC1 and the RNA helicase DDX5 control the production of rhabdomyosarcoma-enriched circRNAs

Dario Dattilo<sup>#,1</sup>, Gaia Di Timoteo<sup>#,1</sup>, Adriano Setti<sup>#1</sup>, Andrea Giuliani<sup>1</sup>, Giovanna Peruzzi<sup>2</sup>, Manuel Beltran Nebot<sup>1</sup>, Alvaro Centrón-Broco<sup>1</sup>, Davide Mariani<sup>3</sup>, Chiara Mozzetta<sup>4</sup>, Irene Bozzoni<sup>\*1,2,3</sup>

<sup>1</sup> Department of Biology and Biotechnology Charles Darwin, Sapienza University of Rome, Rome 00185, Italy.

<sup>2</sup> Center for Life Nano- & Neuro-Science@Sapienza, Fondazione Istituto Italiano di Tecnologia (IIT), Rome 00161, Italy.

<sup>3</sup> Center for Human Technologies@Istituto Italiano di Tecnologia (IIT), Genoa 16152, Italy.

<sup>4</sup> Institute of Molecular Biology and Pathology (IBPM), National Research Council (CNR) of Italy.

\*e-mail: [irene.bozzoni@uniroma1.it](mailto:irene.bozzoni@uniroma1.it)

These authors contributed equally: Dattilo Dario, Di Timoteo Gaia, Setti Adriano

# Supplementary Figure 1

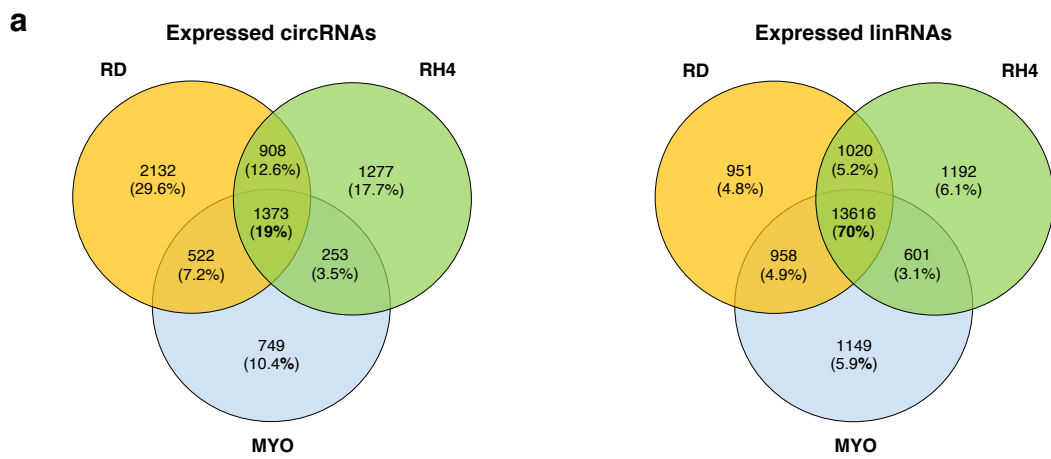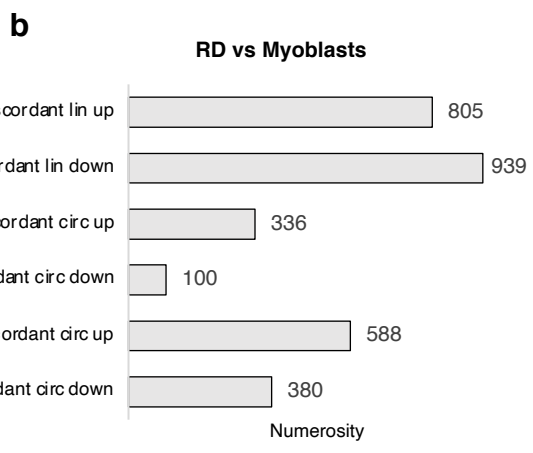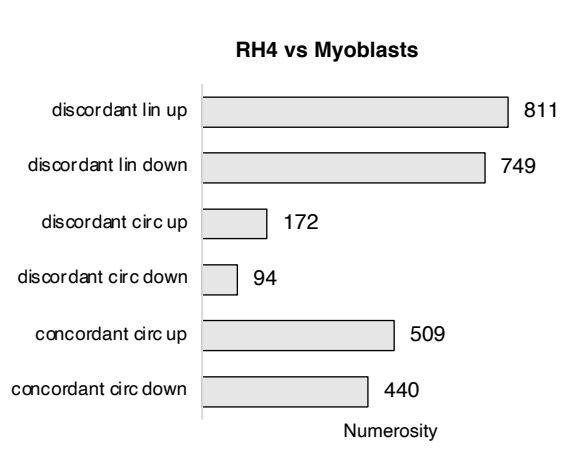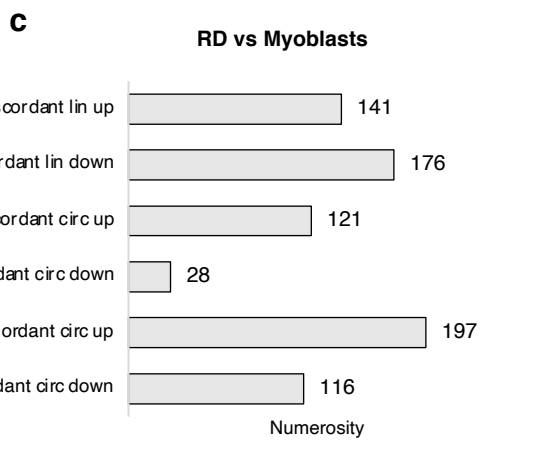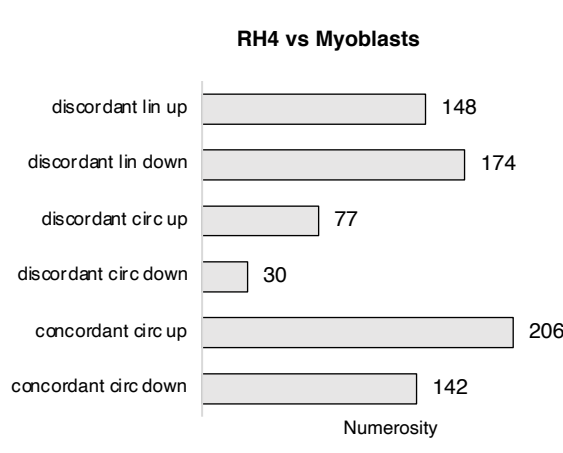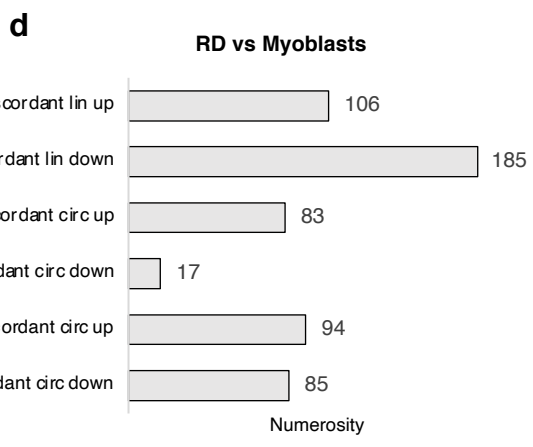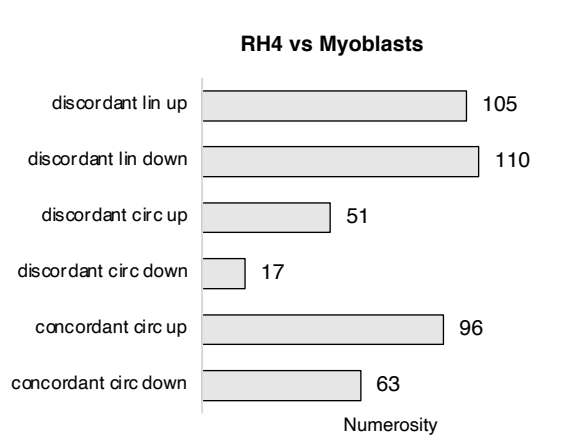

# Supplementary Figure 1

e

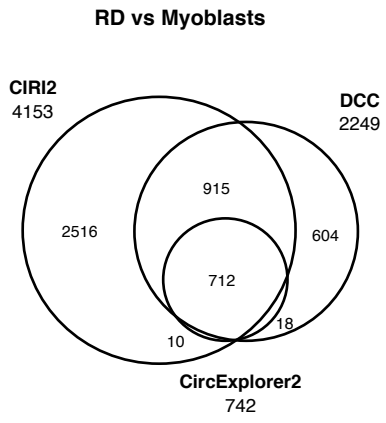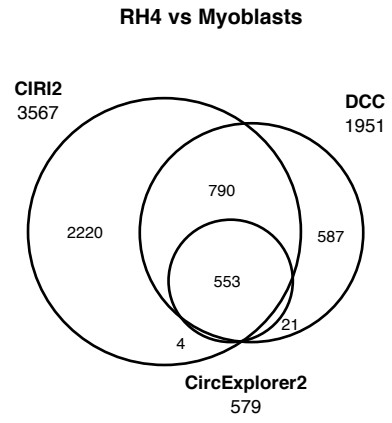

### Supplementary Figure 1: CircRNA levels increase in RMS

**a**, Venn diagrams showing the overlap between circular RNAs (left panel) or linear RNAs (right panel) expressed in wild-type myoblasts ("MYO"), RD cells ("RD") or RH4 cells ("RH4"). **b, c, d**, Bar-plots depicting the numerosity of different scenarios of deregulation in the comparison between RD and myoblasts (left panel) or between RH4 and myoblasts (right panel), either considering the CIRI2 analysis with all detected circRNAs (B), the top 20% expressed circRNAs (C) or "*high-confidence*" circRNAs (D). **e**, Venn diagrams showing the overlap between circular RNAs identified by the three tools CIRI2, DCC and CircExplorer2, either in the comparison between RD and myoblasts (left panel) or between RH4 and myoblasts (right panel"). Exact p-values and source data are provided in Source Data file.

## Supplementary Figure 2

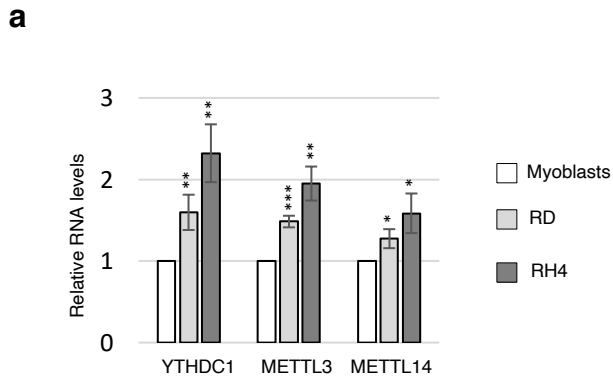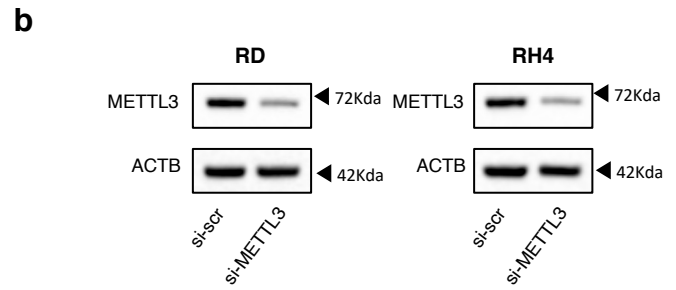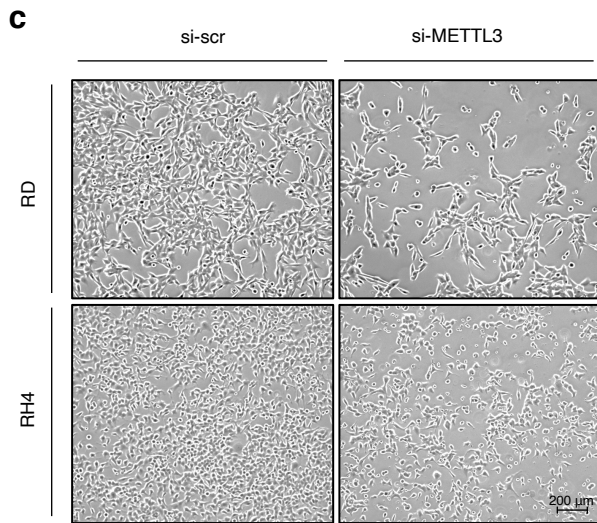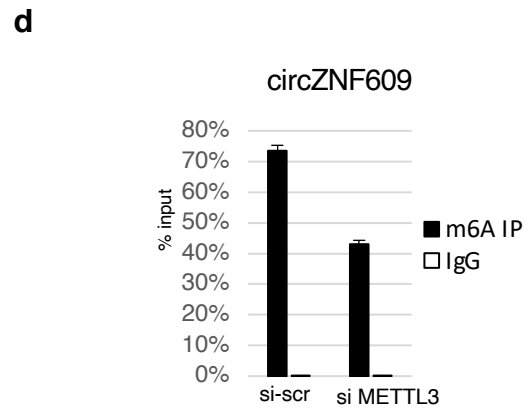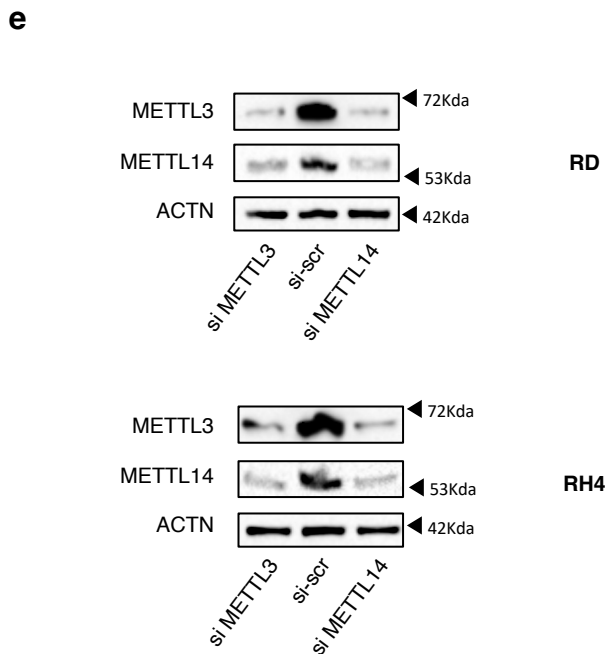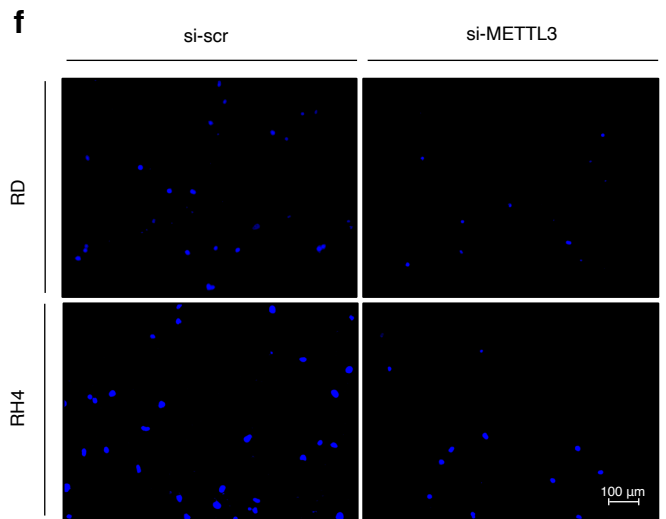

**Supplementary Figure 2: m<sup>6</sup>A factors are altered in RMS and sustain its proliferation and migration rate**

**a**, Relative RNA levels of YTHDC1, METTL3, METTL14 in wild-type myoblasts, RD, and RH4 cell lines. Values are normalized against ACTN1 (RD versus myoblasts) or GAPDH (RH4 versus myoblasts) and expressed as relative quantity with respect to myoblasts set to a value of 1. The relative RNA quantity in the bars is represented as mean of the fold change with standard deviation. The ratio of each sample versus its experimental control was tested by two-tailed Student's t test with correction for multiple test comparison (FDR Benjamini-Hochberg). \* indicates a test-derived p-value < 0.05, \*\* indicate a p-value < 0.01, and \*\*\* a p-value < 0.001. n=3 biologically independent replicates. **b**, Representative western blots to evaluate the decrease of METTL3 protein upon its depletion in RD (left panel) or RH4 (right panel) cell lines; ACTB was used as loading control. n=3 biologically independent replicates. **c**, Representative brightfield images of RD (upper panel) or RH4 cells (lower panel) at 48hr transfection with control treatment ("si-scr") or siRNAs against METTL3 ("si-METTL3"). n=4 biologically independent replicates. **d**, Levels of circZNF609 recovered from a representative m<sup>6</sup>A CLIP in RH4 either in control condition ("si-scr") or upon METTL3 ("si-METTL3"); immunoprecipitation with IgG was used as control. The relative RNA quantity in the bars is represented as mean of technical replicates with standard deviation. n=2 biologically independent replicates. **e**, Representative western blots to evaluate the decrease of METTL3 or METTL14 proteins upon their reciprocal depletion in RD (upper panel) or RH4 (lower panel) cell lines; ACTN was used as loading control. n=3 biologically independent replicates. **f**, Representative images of RD (upper panel) or RH4 cells (lower panel) migrated upon transwell-migration assay after 48hr transfection with control treatment ("si-scr") or siRNAs against METTL3 ("si-METTL3"). Nuclei were stained with DAPI solution. n=4 biologically independent replicates. Exact p-values and source data are provided in Source Data file.

# Supplementary Figure 3

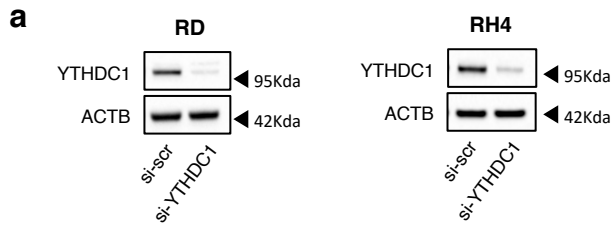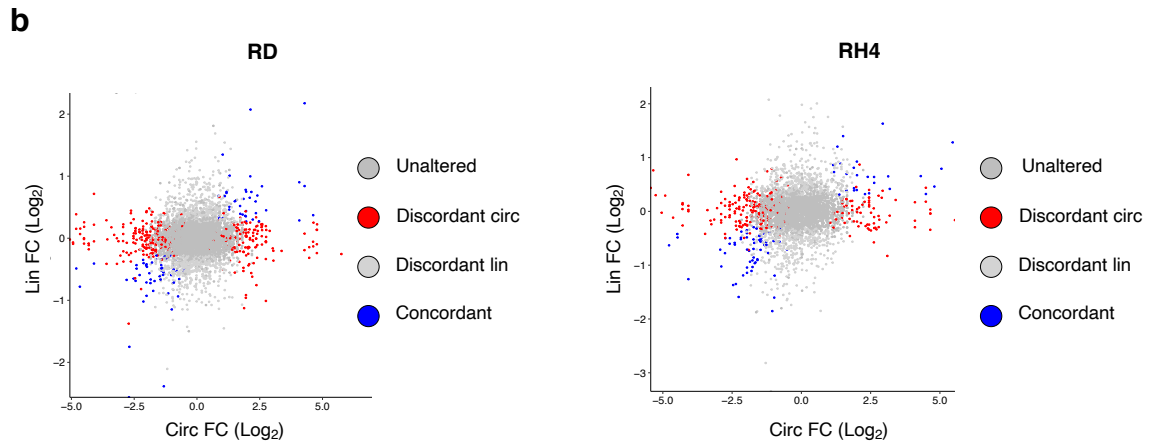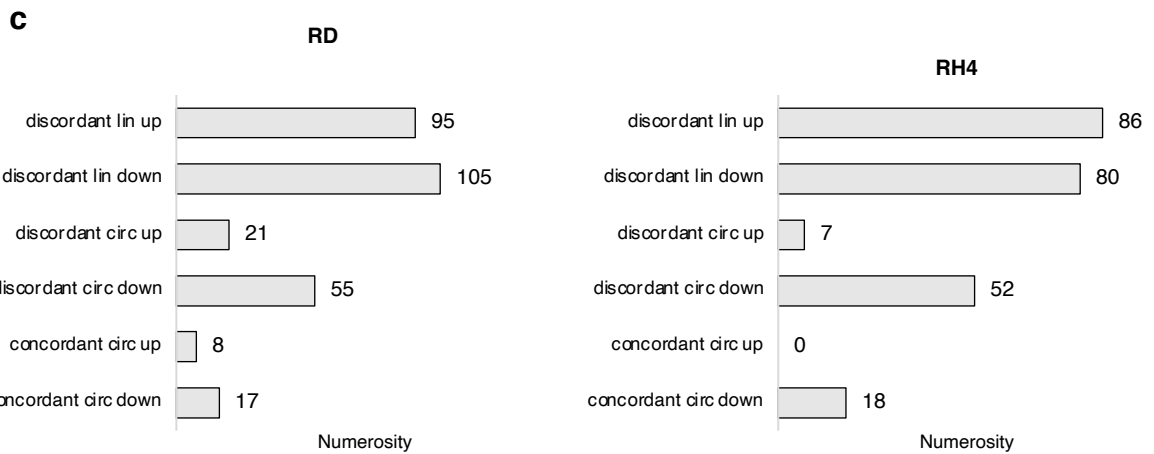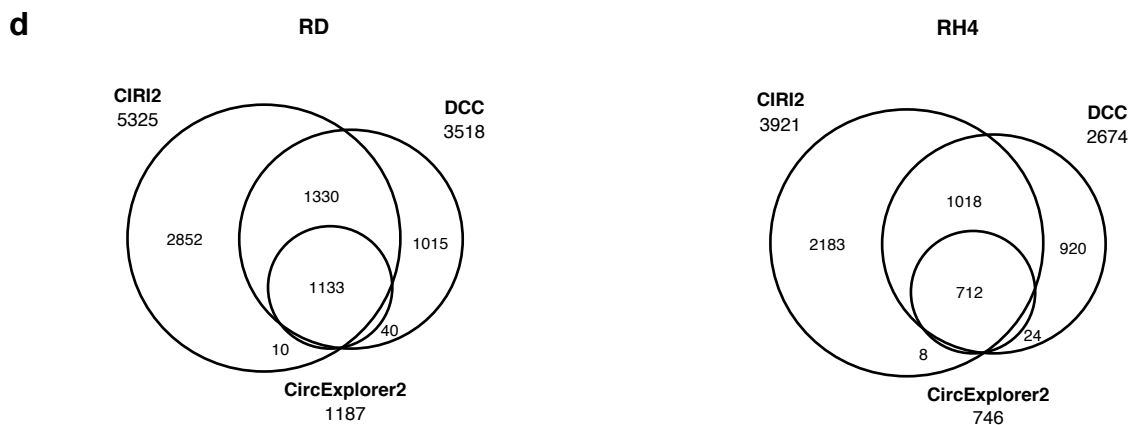

### Supplementary Figure 3: YTHDC1 depletion down-regulates circRNAs in RMS

**a**, Representative western blots to evaluate the decrease of YTHDC1 protein upon its depletion in RD (left panel) or RH4 (right panel) cell lines; ACTB was used as loading control. n=3 biologically independent replicates. **b**, Scatter plots showing, for each circRNA identified in the RNA-seq experiment, the  $\log_2$  fold change along with that of its cognate linear RNA upon YTHDC1 depletion in RD (left panel) or in RH4 (right panel). Significantly deregulated circRNAs are indicated by blue dots when their linear counterpart is deregulated in the same direction ("Concordant") and by red dots when the linear is either unaltered or deregulated in the opposite direction ("Discordant circ"); significantly deregulated linRNAs are indicated by light grey dots when their circular counterpart is either unaltered or deregulated in the opposite direction ("Discordant lin"); unaffected circRNAs are indicated by dark grey dots when their linear counterpart is not altered ("Unaltered"). **c**, Bar-plots depicting the numerosity of different scenarios of deregulation in RD (left panel) or RH4 cell lines depleted for YTHDC1, considering "high-confidence" circRNAs. **d**, Venn diagrams showing the overlap between circular RNAs identified by the three tools CIRI2, DCC and CircExplorer2 upon YTHDC1 depletion, either in RD (left panel) or in RH4 (right panel) cell lines. Exact p-values and source data are provided in Source Data file.



# Supplementary Figure 4

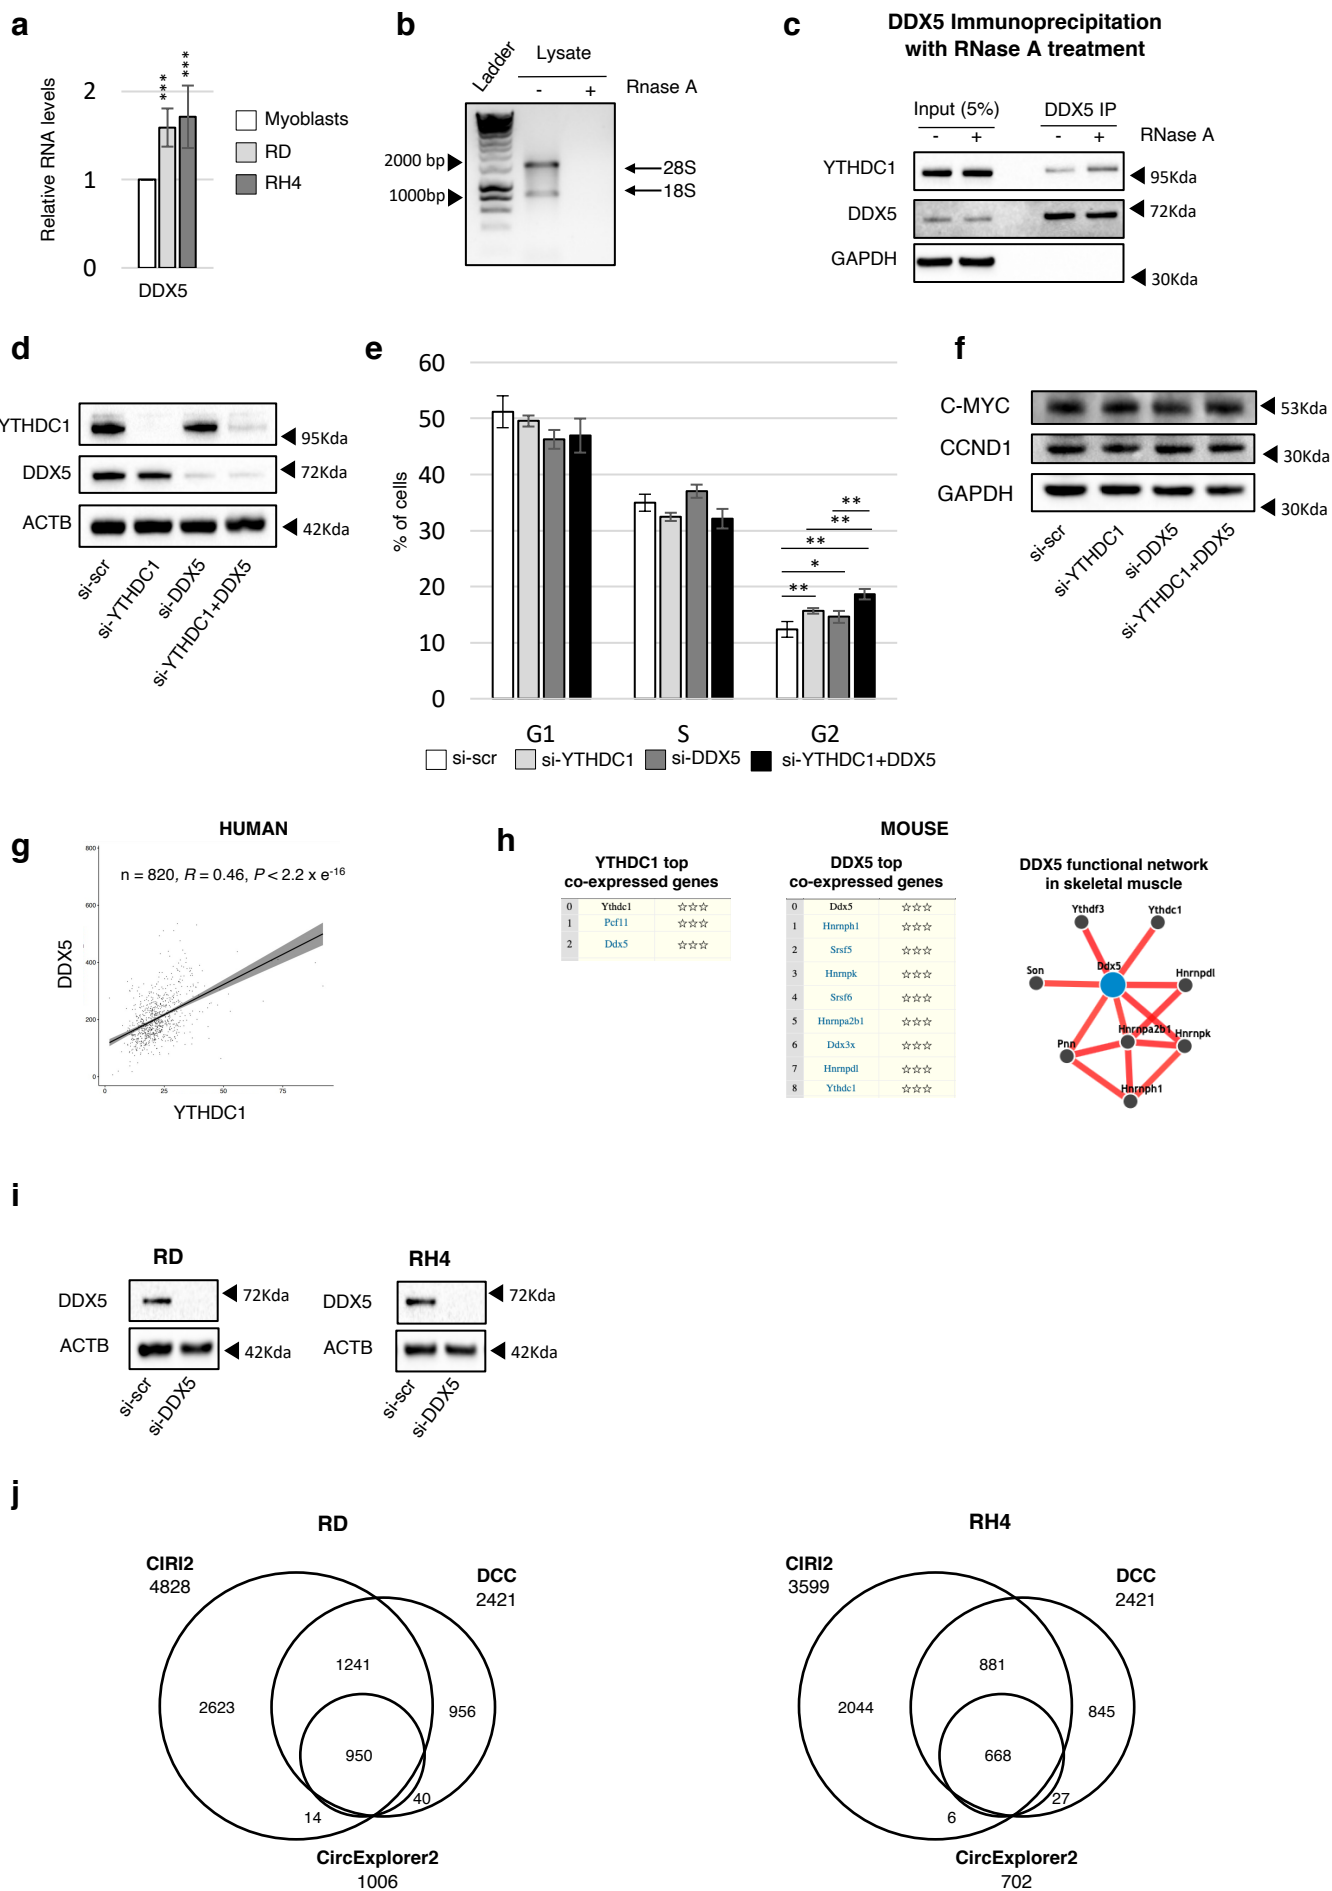

# Supplementary Figure 4

k

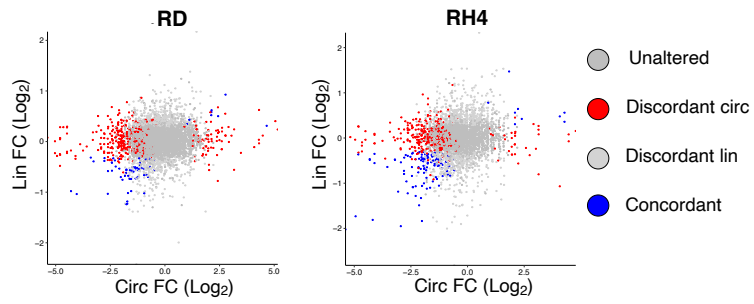

l

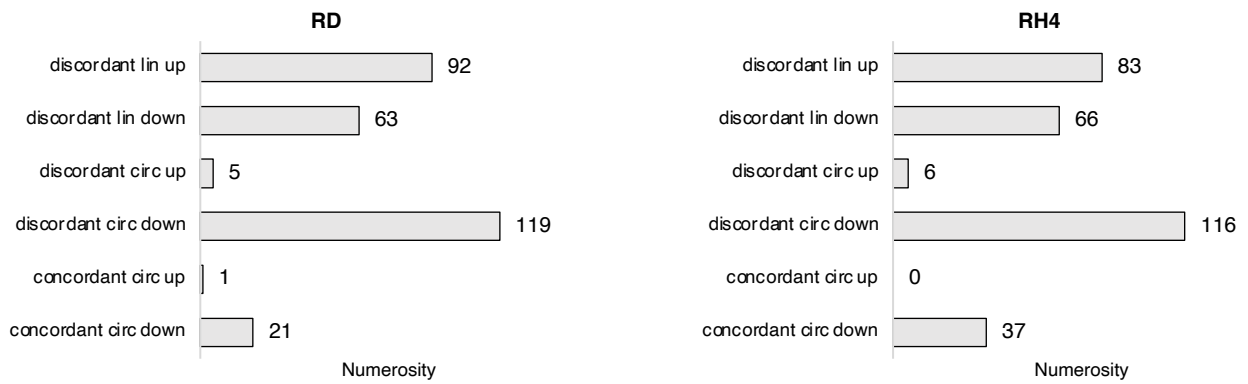

#### Supplementary Figure 4: DDX5 helicase controls circRNA expression and interacts with YTHDC1

**a**, Relative RNA levels of DDX5 in wild-type myoblasts, RD, and RH4 cell lines. Values are normalized against ACTN1 (RD versus myoblasts) or GAPDH (RH4 versus myoblasts) and expressed as relative quantity with respect to myoblasts set to a value of 1. The relative RNA quantity in the bars is represented as mean of the fold change with standard deviation. The ratio of each sample versus its experimental control was tested by two-tailed Student's t test with correction for multiple test comparison (FDR Benjamini-Hochberg). \* indicates a test-derived p-value < 0.05, \*\* indicate a p-value < 0.01, and \*\*\* a p-value < 0.001. n=3 biologically independent replicates. **b**, Representative agarose gel showing RNase A treatment efficacy on total RNA used as input for the co-IP experiment in Supplementary Fig. 4C. HyperLadder™ 1kb (Meridian Bioscience) was loaded to check the size of rRNA bands. 28S and 18S rRNAs are indicated by arrows. n=3 biologically independent replicates. **c**, Representative western blot analysis of DDX5 immunoprecipitation from whole-cell lysate in RD cells, with or without RNase A treatment. The percentage of input is indicated. GAPDH was used as negative control for the co-immunoprecipitation. n=3 biologically independent replicates. **d**, Representative western blot to evaluate the decrease of YTHDC1 and DDX5 proteins upon their individual or combined depletion in RD cells; ACTB was used as loading control. n=4 biologically independent replicates. **e**, FACS analysis of RD cells upon control treatment ("si-scr"), individual YTHDC1 ("si-YTHDC1") or DDX5 ("si-DDX5") knock-down, or their combined knock-down ("si-YTHDC1+DDX5"). Data are represented as mean percentage of cells in each cell cycle phase ± standard deviation. The ratio of each sample versus its experimental control was tested by two-tailed Student's t test with correction for multiple test comparison (FDR Benjamini-Hochberg). \* indicates a test-derived p-value < 0.05, \*\* indicate a p-value < 0.01, and \*\*\* a p-value < 0.001. n=4 biologically independent replicates. **f**, Representative western blot showing the effect of individual or combined depletion of YTHDC1 and DDX5 on selected DDX5 target genes in RD cells; GAPDH was used as loading control. n=4 biologically independent replicates. **g**, Scatter plots depicting the two-sided Pearson correlation between expression (FPKM) of DDX5 and YTHDC1. Dots represent expression counts of each gene retrieved from tumor samples deposited in the MiOncoCirc database (<https://mioncocirc.github.io/>). **h**, Graphical output from two different databases querying gene expression data in mouse. List of top co-expressed genes of YTHDC1 (left panel) or DDX5 (middle panel) are reported; data are obtained from the COXPRESdb (<https://coxpresdb.jp/>). Representation of DDX5 most functionally connected interactor genes in skeletal muscle tissue (right panel), according to the FNTM database (<http://fntm.princeton.edu/>). **i**, Representative western blots to evaluate the decrease of DDX5 protein upon its depletion in RD (left panel) or RH4 (right panel) cell lines; ACTB was used as loading control. n=3 biologically independent replicates. **j**, Venn diagrams showing the overlap between circular RNAs identified by the three tools CIRI2, DCC and CircExplorer2 upon DDX5 depletion, either in RD (left panel) or in RH4 (right panel) cell lines. **k**, Scatter plots showing, for each circRNA identified in the RNA-seq experiment the log<sub>2</sub> fold change along with that of its cognate linear RNA upon DDX5 depletion in RD (left panel) or in RH4 (right panel). Significantly deregulated circRNAs are indicated by blue dots when their linear counterpart is deregulated in the same direction ("Concordant") and by red dots when the linear is either unaltered or deregulated in the opposite direction ("Discordant circ"); significantly deregulated linRNAs are indicated by light grey dots when their circular counterpart is either unaltered or deregulated in the opposite direction ("Discordant lin"); unaffected circRNAs are indicated by dark grey dots when their linear counterpart is not altered ("Unaltered"). **l**, Bar-plots depicting the numerosity of different scenarios of deregulation in RD (left panel) or RH4 cell lines depleted for DDX5, considering "high-confidence" circRNAs. Exact p-values and source data are provided in Source Data file.

# Supplementary Figure 5

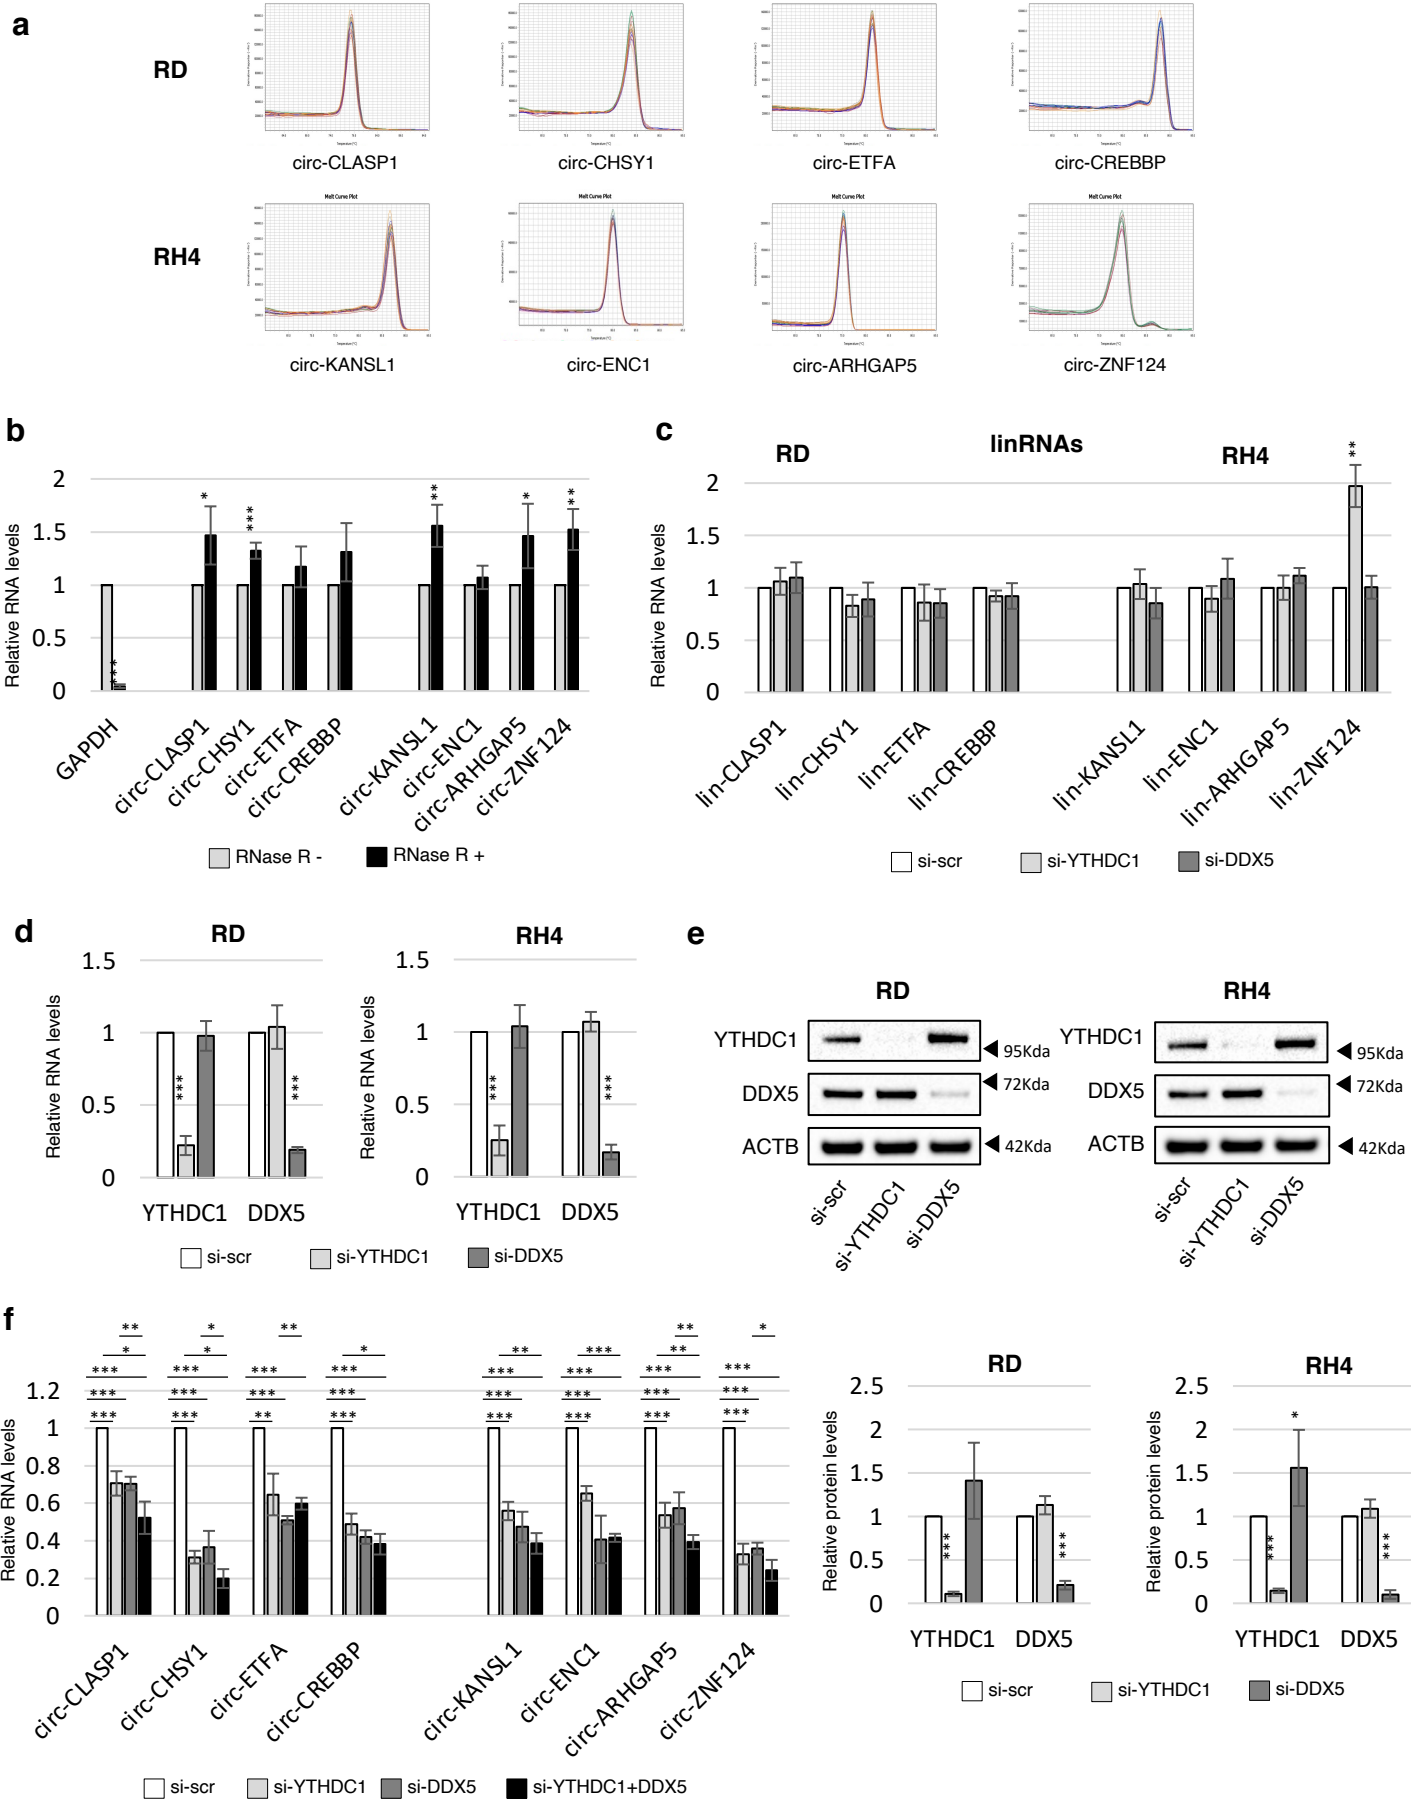

# Supplementary Figure 5

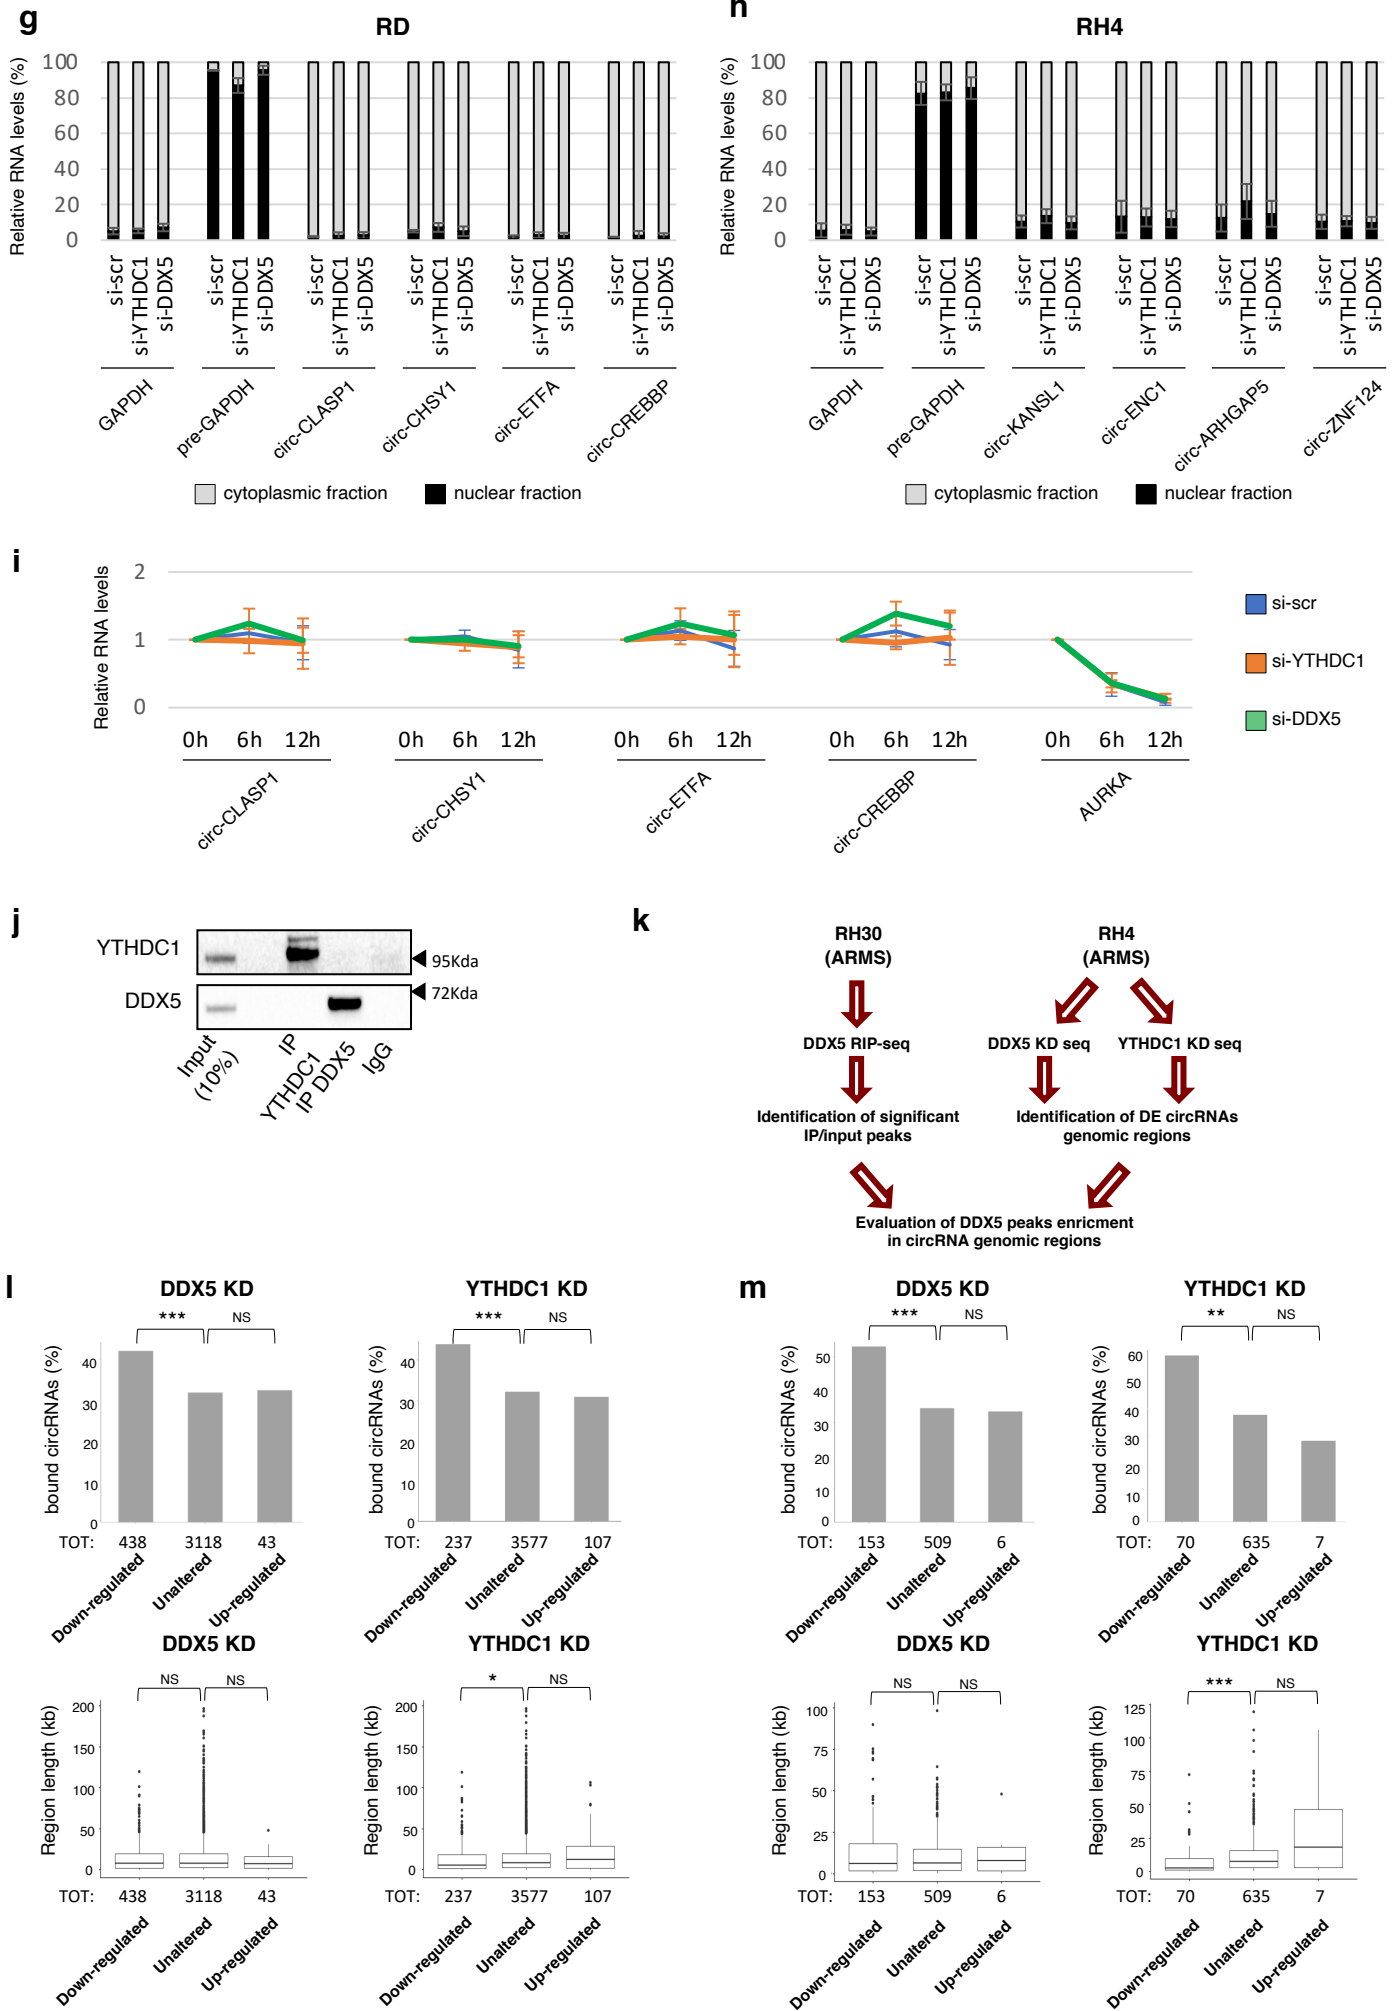

# Supplementary Figure 5

**n**

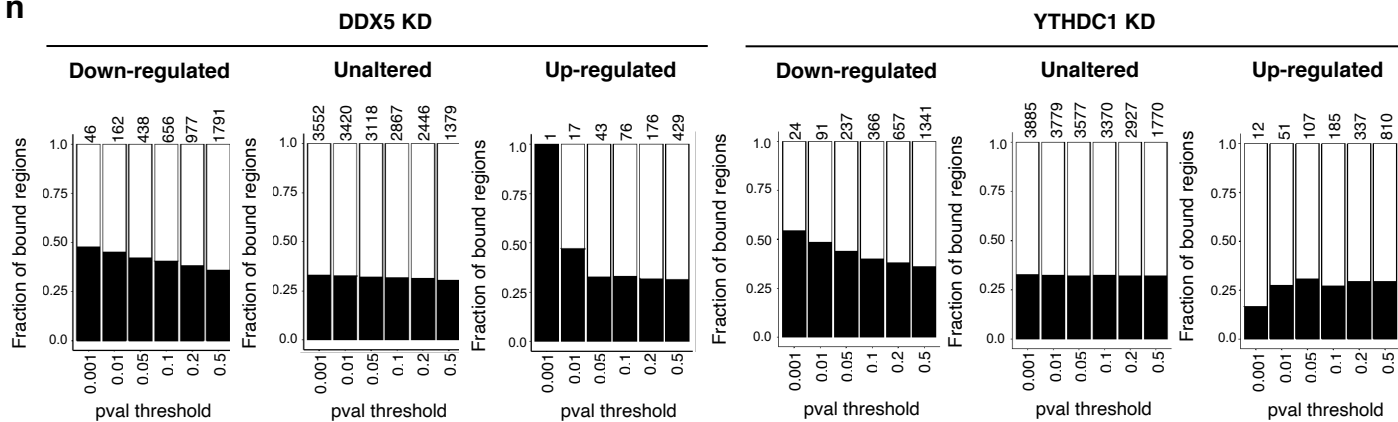

**o**

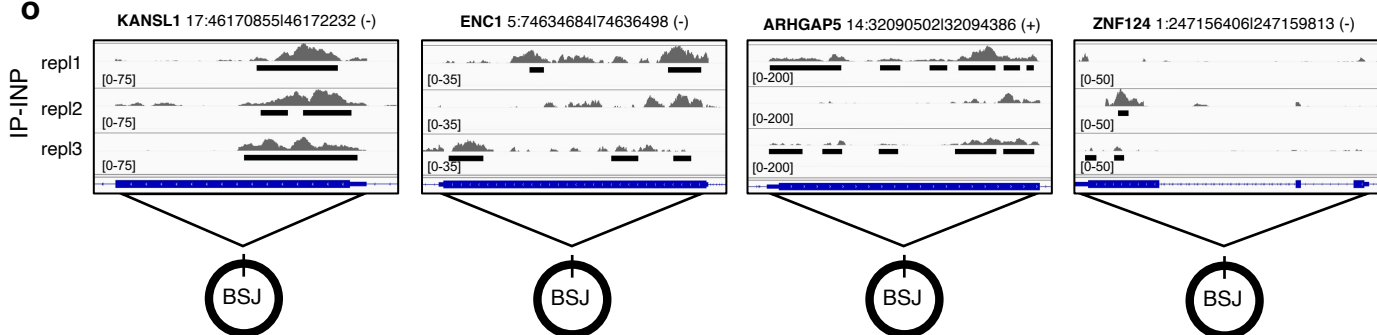

**p**

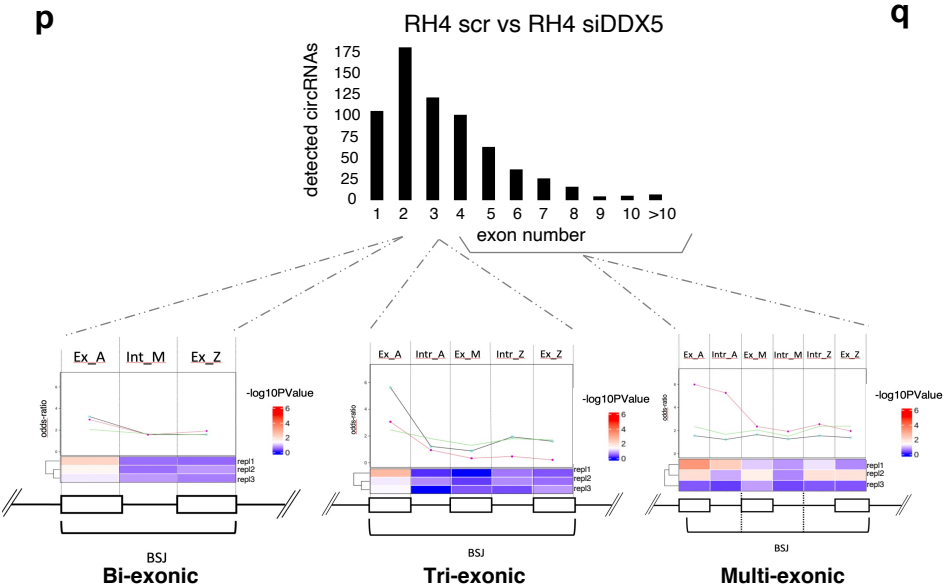

**q**

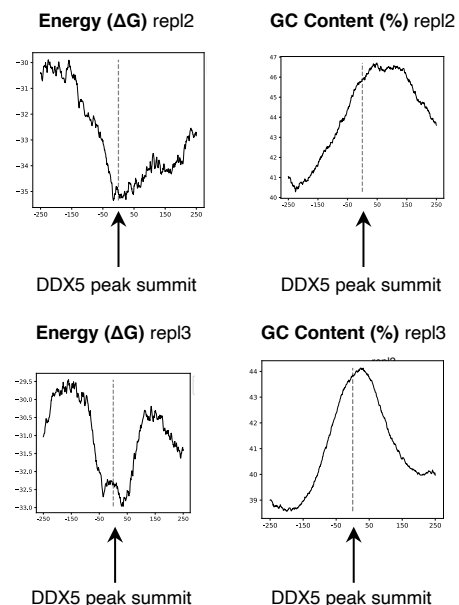

**r**

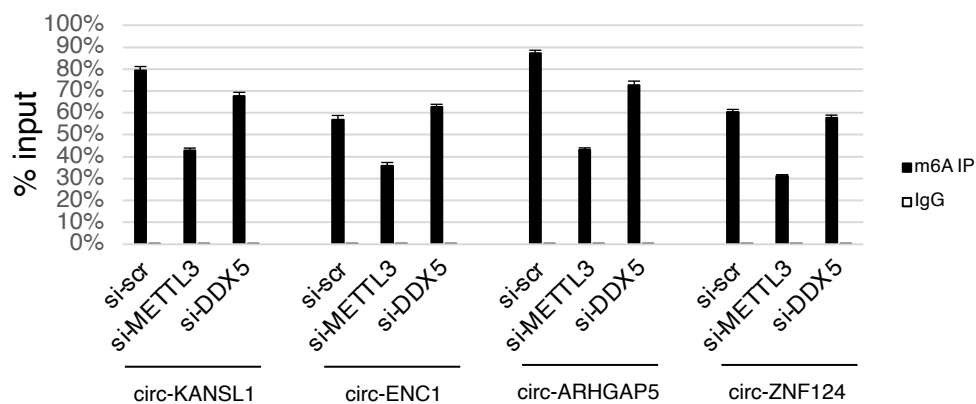

## Supplementary Figure 5: DDX5 and YTHDC1 directly regulate a subset of circRNAs promoting their up-regulation in RMS

**a**, Melt curve plots from the RT-qPCR amplification of selected circRNAs shown in Fig. 5b. **b**, Relative RNA levels of selected circRNAs upon RNase R treatment ("RNase R +") in RD cells. GAPDH was used as positive control for RNase R efficiency. Values are expressed as relative quantity with respect to the untreated condition ("RNase R -") set to a value of 1. The relative RNA quantity in the bars is represented as mean of the fold change with standard deviation. n=4 biologically independent replicates. **c**, Relative RNA levels of selected linear RNAs upon YTHDC1 knock-down ("si-YTHDC1") or DDX5 knock-down ("si-DDX5") in RD or RH4 cell lines. Values are normalized against GAPDH and expressed as relative quantity with respect to scramble siRNA ("si-scr") treatment set to a value of 1. The relative RNA quantity in the bars is represented as mean of the fold change with standard deviation. n=3 biologically independent replicates. **d**, Relative RNA levels of YTHDC1 and DDX5 transcripts upon their reciprocal depletion in RD cells (left panel) or RH4 cells (right panel). Values are normalized against GAPDH and expressed as relative quantity with respect to scramble siRNA ("si-scr") treatment set to a value of 1. The relative RNA quantity in the bars is represented as mean of the fold change with standard deviation n=4 biologically independent replicates. **e**, Representative western blots to evaluate the decrease of YTHDC1 or DDX5 proteins upon their reciprocal depletion in RD (left panel) or RH4 (right panel) cell lines; ACTB was used as loading control. Quantification of the western blots are reported below. Values were normalized to ACTB and expressed as relative quantity with respect to scramble siRNA ("si-scr") treatment set to a value of 1. The relative protein quantity in the bars is represented as mean of the fold change with standard deviation. n=4 biologically independent replicates. **f**, Relative RNA levels of selected circRNAs upon control treatment ("si-scr"), individual YTHDC1 ("si-YTHDC1") or DDX5 ("si-DDX5") knock-down, or their combined knock-down ("si-YTHDC1+DDX5") in RD or RH4 cell lines. Values are normalized against GAPDH and expressed as relative quantity with respect to scramble siRNA ("si-scr") treatment set to a value of 1. The relative RNA quantity in the bars is represented as mean of the fold change with standard deviation. n=4 biologically independent replicates. **g, h**, Bar-plots showing the percentage in the nuclear and the cytoplasmic fraction in RD (g) or RH4 (h) cell lines for selected circRNAs in control condition ("si-scr") or upon YTHDC1 ("si-YTHDC1") or DDX5 knock-down ("si-DDX5"). GAPDH and pre-GAPDH were used as controls for cell fractionation. The relative RNA quantity in the bars is represented as mean of technical replicates with standard deviation n=3 biologically independent replicates. **i**, Relative RNA levels of selected circRNAs after Actinomycin D treatment in RD cell lines at different time points (0h, 6h, 12h), either in control condition ("si-scr") or upon YTHDC1 ("si-YTHDC1") or DDX5 knock-down ("si-DDX5"). For each condition, values are expressed as relative quantity with respect to 0h time point set to a value of 1. The relative RNA quantity in the bars is represented as mean of the fold change with standard deviation. n=3 biologically independent replicates. **j**, Representative western blot showing YTHDC1 or DDX5 IP efficiency. The percentage of input is indicated. Immunoprecipitation with IgG was used as control. n=3 biologically independent replicates. **k**, Scheme depicting bioinformatic workflow for the analysis of DDX5 binding to circRNAs deregulated upon YTHDC1 and DDX5 knock-down in RH4 cells. **l, m**, Bar plots representing the fraction of all detected circRNAs (l) or "high-confidence" circRNAs (m) down-regulated, unaltered or up-regulated upon either DDX5 (left panel) or YTHDC1 knock-down (right panel) in RH4 identified as DDX5 binding targets. P-values for differences between proportions were calculated using two-sided Fisher exact test. \*\*\* indicates a p-value < 0.001. Box plots depicting the length of genomic regions involved in circularization for each circRNA category analyzed are reported below. For genomic lengths, the differences between groups were calculated using Mann-Whitney U test. Numbers of each group – representing the sum of bound and unbound targets – are reported below both the bars and the boxes. See methods section for statistical analyses details. **n**, Bar plots representing the fraction of circRNAs down-regulated, unaltered or up-regulated upon either DDX5 (left panel) or YTHDC1 knock-down (right panel) and identified as DDX5 targets using different p-value cutoffs to select differentially expressed circRNAs in knock-down condition. Numbers of each group – representing the sum of bound and unbound targets – are reported above the bars. See methods section for statistical analyses details. **o**, IGV screens depicting examples of DDX5 RIP-seq peaks on validated circRNAs in RH4 cell line. Coverage (CPM) of IP-INP signal for each replicate of the DDX5 RIP-seq is represented, peak regions are depicted as black lines, transcriptome annotation is depicted with a graphic representation of regions involved in circularization. **p**, Figure representing the DDX5 binding enrichment analysis for each RIP replicate on on bi-exonic, three-exonic and multi-exonic circRNAs (high-confidence), comparing down-regulated circRNAs upon DDX5 depletion (RH4 cell line) to invariant circRNAs. The bar plot on the top depicts high-confidence circRNAs counts for each circRNA type with the specified exon number. Heatmaps on the bottom depict, for each circRNA category,  $-\log_{10}$  p-value associated to each region. The line plots annotation represents the associated odds-ratio. Statistical significance was assessed using two-sided Fisher's exact test. **q**, Line plots representing  $\Delta G$  (left panel) and GC content (right panel) of 500nt regions centered to DDX5 peak summit of RIP-Seq replicates 2 and 3.

r, Levels of selected circRNAs recovered from a representative m<sup>6</sup>A CLIP in RH4 either in control condition (“si-scr”) or upon METTL3 (“si-METTL3”) or DDX5 knock-down (“si-DDX5”); immunoprecipitation with IgG was used as control. The relative RNA quantity in the bars is represented as mean of technical replicates with standard deviation. n=2 biologically independent replicates. In all panels, the ratio of each sample versus its experimental control was tested by two-tailed Student’s t test, either without correction (b) or with correction for multiple test comparison (FDR Benjamini-Hochberg) (c,d,e,f,g,h,i). \* indicates a test-derived p-value < 0.05, \*\* indicate a p-value < 0.01, and \*\*\* a p-value < 0.001. Exact p-values and source data are provided in Source Data file.

## Supplementary Table Legends

### Supplementary Table 1

DNA oligonucleotides used in this study.

| Oligonucleotide name | Sequence (5'-3')          | Supplier         |
|----------------------|---------------------------|------------------|
| ACTN1_fw             | ATCAACTTCAACACGCTGCA      | Bio-Fab Research |
| ACTN1_rev            | AGCCTCCGGATTCATTACAG      | Bio-Fab Research |
| GAPDH_fw             | CACCATCTCCAGGAGTGAG       | Bio-Fab Research |
| GAPDH_rev            | CCTTCTCCATGGTGGTGAAGAC    | Bio-Fab Research |
| pre-GAPDH_fw         | CTGGGGGTAAAGGAGATGCTG     | Bio-Fab Research |
| pre-GAPDH_rev        | TTACCAGAGTTAAAAGCAGCCC    | Bio-Fab Research |
| YTHDC1_fw            | CCTACGCCAGATGGTTCTGAG     | Bio-Fab Research |
| YTHDC1_rev           | CATTCTCAGTGTGTTCCCTTG     | Bio-Fab Research |
| METTL3_fw            | AAGCAGCTGGACTCTCTGCG      | Bio-Fab Research |
| METTL3_rev           | GCACTGGGCTGTCACTACGG      | Bio-Fab Research |
| METTL14_fw           | GCAGTTGGGAGCTGAAAGTG      | Bio-Fab Research |
| METTL14_rev          | GGAAGCCCTGCAAGTTTCTC      | Bio-Fab Research |
| DDX5_fw              | GCCGGGACCGAGGGTTTGGT      | Bio-Fab Research |
| DDX5_rev             | CTTGCTGTGTCGCCCTAGCCA     | Bio-Fab Research |
| ZNF609_fw_circ       | AACCGGAGCCAGAGGAAGG       | Bio-Fab Research |
| ZNF609_rev_circ      | AGCTATGTTCTCAGACCTGC      | Bio-Fab Research |
| CLASP1_fw            | TGGATGGACTTGCTACCTCTT     | Bio-Fab Research |
| CLASP1_rev_circ      | TAAAGGAGTGAGTGGCAGAGT     | Bio-Fab Research |
| CLASP1_rev_lin       | CTGCTCCCTCACAGAGTCTT      | Bio-Fab Research |
| CLASP1_rev_pre       | CTAGAAACCAAGGAAGCATGC     | Bio-Fab Research |
| CHSY1_fw             | AGTGTCTCCGGGAGATGTAC      | Bio-Fab Research |
| CHSY1_rev_circ       | TACAGATGTGTCAGAACCCTCA    | Bio-Fab Research |
| CHSY1_rev_lin        | GGGTGTAATGTGATAGCTTGGT    | Bio-Fab Research |
| CHSY1_rev_pre        | GTTTCTATGATACGCTCAGAAC    | Bio-Fab Research |
| ETFA_fw              | TGCTGCTGTTGATGCTGGCT      | Bio-Fab Research |
| ETFA_rev_circ        | AGTAATGGGTGCTAGGGAAATC    | Bio-Fab Research |
| ETFA_rev_lin         | GCAACTATTCCATAATCTGCCAC   | Bio-Fab Research |
| ETFA_rev_pre         | GCTAACTGCTCAGGAACACTG     | Bio-Fab Research |
| CREBBP_fw            | AGCTGGAATGCCGTACCCTA      | Bio-Fab Research |
| CREBBP_rev_circ      | ATTGGGTATCAGTCCATCAGGA    | Bio-Fab Research |
| CREBBP_rev_lin       | CTTGACTAAAGGGCTGTCCAA     | Bio-Fab Research |
| CREBBP_rev_pre       | CCGGGTTAGGTAGGAAGTA       | Bio-Fab Research |
| KANSL1_fw            | TGAAGAGGAAGAAGTACCAG      | Bio-Fab Research |
| KANSL1_rev_circ      | ATTCAGCACAGAGAGACAGGA     | Bio-Fab Research |
| KANSL1_rev_lin       | GTCTGTTTGTGACGAATTCG      | Bio-Fab Research |
| ENC1_fw              | TACTGCATTTGTCAGCACCTG     | Bio-Fab Research |
| ENC1_rev_circ        | TGGACTTCCGGTTCTCATGC      | Bio-Fab Research |
| ENC1_rev_lin         | CCTTCATGTCAGTTAGAGCAT     | Bio-Fab Research |
| ARHGAP5_fw           | GTGAAAGAAGATAAAAAGGAAGATG | Bio-Fab Research |
| ARHGAP5_rev_circ     | AAGGTAACCAGATATGCTTCTC    | Bio-Fab Research |
| ARHGAP5_rev_lin      | GAGGGGCATCCCAAAGTAAT      | Bio-Fab Research |
| ZNF124_fw_circ       | ACTGTGAATGTAAGGTGTAGGAA   | Bio-Fab Research |
| ZNF124_fw_lin        | CTTCACTCTCGGCGGTTTCCAG    | Bio-Fab Research |
| ZNF124_rev           | TCCAACAAGCCCACTCCT        | Bio-Fab Research |
| VAMP3_fw_circ        | ATGTGGGCAATCGGGATTAC      | Bio-Fab Research |
| VAMP3_rev_circ       | GCACGGTCGTCTAACTCAGA      | Bio-Fab Research |
| G9A_fw               | AGAGTGTGGACGGAGAGCTC      | Bio-Fab Research |
| G9A_rev              | GGTCTCCCCTTGAGGAT         | Bio-Fab Research |
| RNA spike-In_fw      | TTCTCTGTAGCCCCGACTGT      | Bio-Fab Research |
| RNA spike-In_rev     | CTCTCCCCTTCTTCACTTTCTTTT  | Bio-Fab Research |
| AURKA_fw             | TTCTCCGTCCTGAGTGT         | Bio-Fab Research |
| AURKA_rev            | GGTCCATGATGCCTCTAGC       | Bio-Fab Research |
| DNA spike_T7_fw      | TAATACGACTCACTATAGGG      | Bio-Fab Research |
| DNA spike_BGH_rev    | GCCTGGCAACTAGAAGGCA       | Bio-Fab Research |



**Supplementary Table 2**  
SiRNAs used in this study.

| siRNA name         | Sense Sequence              | Supplier      | Catalog No. |
|--------------------|-----------------------------|---------------|-------------|
| Si-scramble (Ctrl) | AAT TCT CCG AAC GTG TCA CGT | Qiagen        | 1022076     |
| Si-METTL3_1        | AGG AGC CAG CCA AGA AAT CAA | Qiagen        | SI04340749  |
| Si-METTL3_2        | CTG CAA GTA TGT TCA CTA TGA | Qiagen        | SI04317096  |
| Si-METTL3_3        | CAG GAG ATC CTA GAG CTA TTA | Qiagen        | SI04241265  |
| Si-METTL3_4        | CCG CGT GAG AAT TGG CTA TAT | Qiagen        | SI04140038  |
| Si-METTL14         | CTGATAGAGTTCAGCTAATTA       | Qiagen        | SI05069463  |
| Si-YTHDC1          | CCA GAA GAT TAT GAT ATT CAT | Qiagen        | SI00764680  |
| Si-DDX5            | AAC CGC AAC CAU UGA CGC CAU | Sigma-Aldrich | Custom      |

**Supplementary Table 3**  
Antibodies used in this study.

| Antibody name                                    | Supplier                 | Catalog No. | Dilution |
|--------------------------------------------------|--------------------------|-------------|----------|
| Anti-m6A polyclonal antibody                     | Abcam                    | ab151230    | 1:100    |
| Anti-METTL3 [EPR18810] monoclonal antibody       | Abcam                    | ab195352    | 1:1000   |
| Anti-METTL14 polyclonal antibody                 | Atlas                    | HPA038002   | 1:1000   |
| Anti-ACTB-Peroxidase (AC-15) monoclonal antibody | Sigma-Aldrich            | A3854       | 1:2500   |
| Anti-YTHDC1 polyclonal antibody                  | Abcam                    | ab122340    | 1:500    |
| Anti-DDX5 polyclonal antibody                    | Cell Signalling          | 9877        | 1:1000   |
| Anti-DDX5 polyclonal antibody                    | Abcam                    | ab10261     | 1:100    |
| Anti-DROSHA polyclonal antibody                  | Abcam                    | ab12286     | 1:1000   |
| Anti-SRSF3 polyclonal antibody                   | Abcam                    | ab125124    | 1:500    |
| Anti-GAPDH (6C5) monoclonal antibody             | Santa Cruz Biotechnology | sc-32233    | 1:1000   |
| Anti-CCND1 (72-13G) monoclonal antibody          | Santa Cruz Biotechnology | sc-450      | 1:500    |
| Anti-c-MYC (9E10) monoclonal antibody            | Santa Cruz Biotechnology | sc-40       | 1:500    |
| Anti-ACTN (H-300) polyclonal antibody            | Santa Cruz Biotechnology | sc-15335    | 1:1000   |
| Anti-Rabbit IgG (H+L) Secondary Antibody, HRP    | Thermo Fisher Scientific | 31460       | 1:10000  |
| Anti-Mouse IgG (H+L) Secondary Antibody, HRP     | Thermo Fisher Scientific | 32430       | 1:10000  |
| Anti-Goat IgG (H+L) Secondary Antibody, HRP      | Thermo Fisher Scientific | 31402       | 1:10000  |
